# Supplementary material for: A facile synthesis of FeS/Fe3C nanoparticles highly dispersed on in situ grown N-doped CNTs as cathode electrocatalysts for microbial fuel cells
Source: Royal Society of Chemistry journal article supplement (doi:10.1039/d3cp02152a), 2023-01-01
Supplement: d3cp02152a1.pdf [file d3cp02152a1.pdf]

## Supporting Information

### **A Facile Synthesis of FeS/Fe<sub>3</sub>C Nanoparticles Highly Dispersed on in-Situ Grown N-Doped CNTs as Cathode Electrocatalyst for Microbial Fuel Cells**

Zhuoyue Chen<sup>a</sup>, Yingyu Lin<sup>a</sup>, Yuying Zhou<sup>a</sup>, Yuxian Yang<sup>a</sup>, Yaotang Zhong<sup>a</sup>,  
Mengqing Xu<sup>a,b</sup>, Weishan Li<sup>a,b,\*</sup>

<sup>a</sup> School of Chemistry, South China Normal University, Guangzhou 510006, China

<sup>b</sup> National and Local Joint Engineering Research Center of MP TES in High Energy and Safety LIBs, Engineering Research Center of MTEES (Ministry of Education), and Key Lab. of ETESPG(GHEI), South China Normal University, Guangzhou 510006, China

\*Corresponding authors, e-mail: liwsh@sncu.edu.cn.

## Experimental methods

**Preparation of FeS@NCNTs-700:** Iron nitrate ( $\text{Fe}(\text{NO}_3)_3 \cdot 9\text{H}_2\text{O}$ , 1.05 g) was ground with thiourea ( $\text{CH}_4\text{N}_2\text{S}$ , 0.95 g). The resulting mixture was then transferred into a quartz ark and calcined in a tube furnace under  $\text{N}_2$  atmosphere for 3 h at 700 °C to obtain FeS. To obtain NCNTs, iron nitrate (1.05 g) and melamine (5 g) were mixed and calcined in  $\text{N}_2$  atmosphere for 3 h at 700 °C and then the resulting sample was treated with 2 M HCl to remove  $\text{Fe}_3\text{C}$ . FeS@NCNTs-700 was obtained by grounding the resultant FeS and NCNTs.

**Preparation of  $\text{Fe}_3\text{C}@$ NCNTs-700:**  $\text{Fe}_3\text{C}@$ NCNTs-700 was synthesized in the same way as Nano-FeS/ $\text{Fe}_3\text{C}@$ NCNTs-700, but without adding thiourea.

**Formulation of phosphate buffered saline (PBS):** PBS contained disodium hydrogen phosphate anhydrous ( $\text{Na}_2\text{HPO}_4$ , 4.21  $\text{g}\cdot\text{L}^{-1}$ ), sodium dihydrogen phosphate anhydrous ( $\text{NaH}_2\text{PO}_4$ , 2.13  $\text{g}\cdot\text{L}^{-1}$ ), potassium chloride (KCl, 0.13  $\text{g}\cdot\text{L}^{-1}$ ) and ammonium chloride ( $\text{NH}_4\text{Cl}$ , 0.31  $\text{g}\cdot\text{L}^{-1}$ ). The pH of the resulting solution is 7.0.

**Formulation of acetate culture solution (1  $\text{g}\cdot\text{L}^{-1}$ ):** Acetate culture solution contained anhydrous sodium acetate ( $\text{CH}_3\text{COONa}$ , 1  $\text{g}\cdot\text{L}^{-1}$ ), disodium hydrogen phosphate anhydrous ( $\text{Na}_2\text{HPO}_4$ , 4.21  $\text{g}\cdot\text{L}^{-1}$ ), sodium dihydrogen phosphate anhydrous ( $\text{NaH}_2\text{PO}_4$ , 2.13  $\text{g}\cdot\text{L}^{-1}$ ), potassium chloride (KCl, 0.13  $\text{g}\cdot\text{L}^{-1}$ ), ammonium chloride ( $\text{NH}_4\text{Cl}$ , 0.31  $\text{g}\cdot\text{L}^{-1}$ ), vitamin solution (12.5  $\text{mL}\cdot\text{L}^{-1}$ ) and mineral solution (12.5  $\text{mL}\cdot\text{L}^{-1}$ ). The pH of the resulting culture solution is 7.0.

**Preparation of cathode:** 17.5 mg of 20 wt% Pt/C or Nano-FeS/Fe<sub>3</sub>C@NCNTs-700 were mixed with 15  $\mu$ L of deionized water, 116.7  $\mu$ L of Nafion solution and 58.4  $\mu$ L of anhydrous ethanol and sonicated for 10 min. Then the slurry was applied uniformly on the carbon cloth with a diameter of 4 cm and air-dried for 24 h.

**Measurements of power density:** The power density of the MFCs was measured in a two-electrode configuration, where the cathode of MFC was served as the working electrode and the anode was as the counter and reference electrodes. The MFCs were discharged under constant resistor till the voltage of MFC dropped below 0.02 V. Then the resistor was removed and 15 mL of solution was replaced with fresh one. After 6 h of resting, LSV was performed from open circuit potential to 0 V relative at a scan rate of 1 mV s<sup>-1</sup>.

**Theoretical calculation method:** The (114) crystal plane of FeS and the (031) crystal plane of Fe<sub>3</sub>C were selected to calculate the adsorption energy of FeS and Fe<sub>3</sub>C because these are the preferred exposed crystal planes of FeS and Fe<sub>3</sub>C in Nano-FeS/Fe<sub>3</sub>C@NCNTs-700. Spin-polarization density functional theory (DFT) calculations based on the first-principles<sup>1, 2</sup> were performed within the generalized gradient approximation (GGA) using the Perdew-Burke-Ernzerhof (PBE)<sup>3</sup> formulation. The projected augmented wave (PAW) potentials<sup>4, 5</sup> were applied to describe the ionic cores with taking valence electrons into account and using a plane wave basis set with a kinetic energy cutoff of 450 eV. The electronic energy was considered self-consistent when the energy change was smaller than 10<sup>-5</sup> eV. A geometric optimization was

considered convergent when the energy change was smaller than  $0.02 \text{ eV } \text{\AA}^{-1}$ . During the relaxation, the Brillouin zone with a  $2 \times 2 \times 1$  Gamma centered grid was used. The  $20 \text{ \AA}$  vacuum layer was normally added to the surface to eliminate the artificial interactions between periodic images. In the k-point optimization, two of  $\text{Fe}_3\text{C}$  structure,  $2 \times 2 \times 1$  and  $3 \times 3 \times 1$  had been considered. It was found that the energies of these two structures were  $-743.093 \text{ eV}$  and  $-743.111 \text{ eV}$ , and the corresponding adsorption energies with  $\text{O}_2$  were  $-1.824 \text{ eV}$  and  $-1.828 \text{ eV}$ , respectively. These values are almost the same and the  $2 \times 2 \times 1$  structure was used for k-point optimization in this work for saving calculation time.

## Experimental results

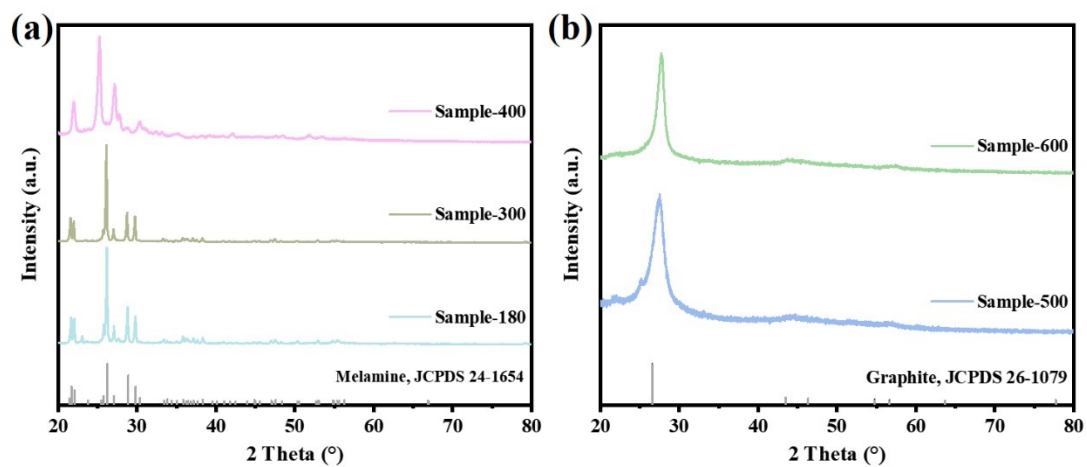

**Fig. S1** XRD of samples carbonized at (a) 180 °C, 300 °C and 400 °C as well as (b) 500 °C and 600 °C.

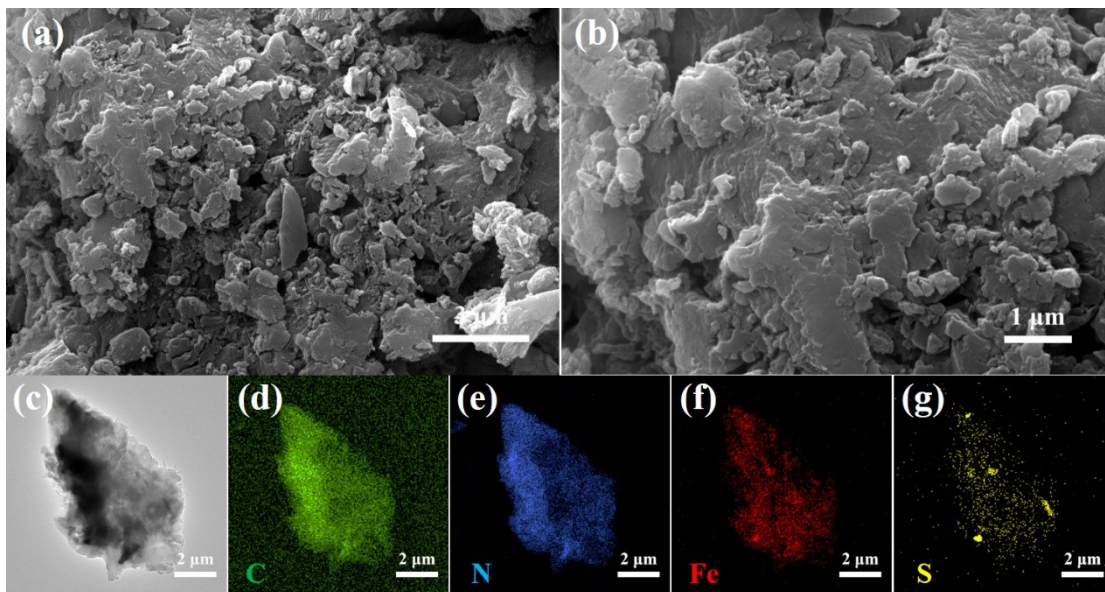

**Fig. S2** (a, b) SEM images at different magnifications, (c) TEM image and (d-g) EDS elemental mappings of sample carbonized at 500 °C.

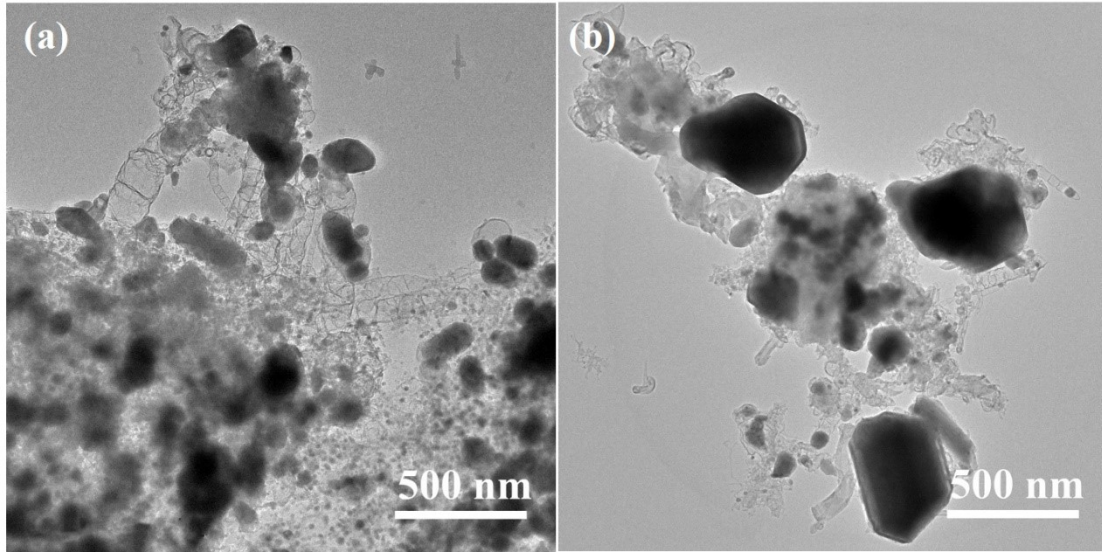

**Fig. S3** TEM images of (a) Nano-FeS/Fe<sub>3</sub>C@NCNTs-800 and (b) Nano-FeS/Fe<sub>3</sub>C@NCNTs-900.

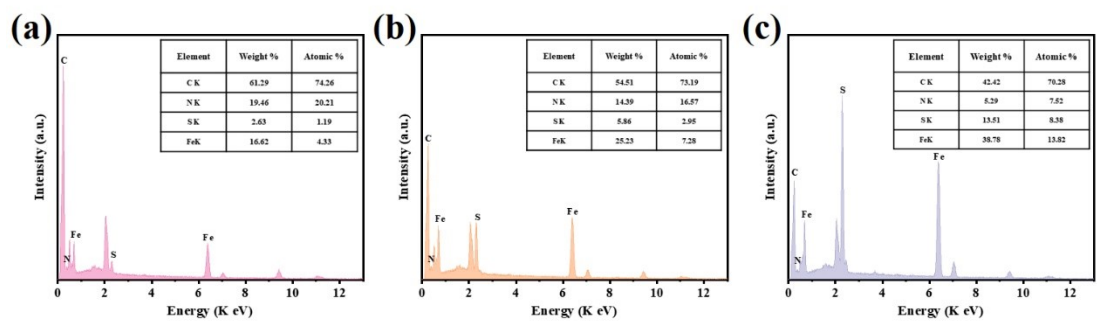

**Fig. S4** Energy-dispersive X-ray spectra (EDS) of Nano-FeS/Fe<sub>3</sub>C@NCNTs carbonized at (a)700 °C (b) 800 °C and (c)900 °C.



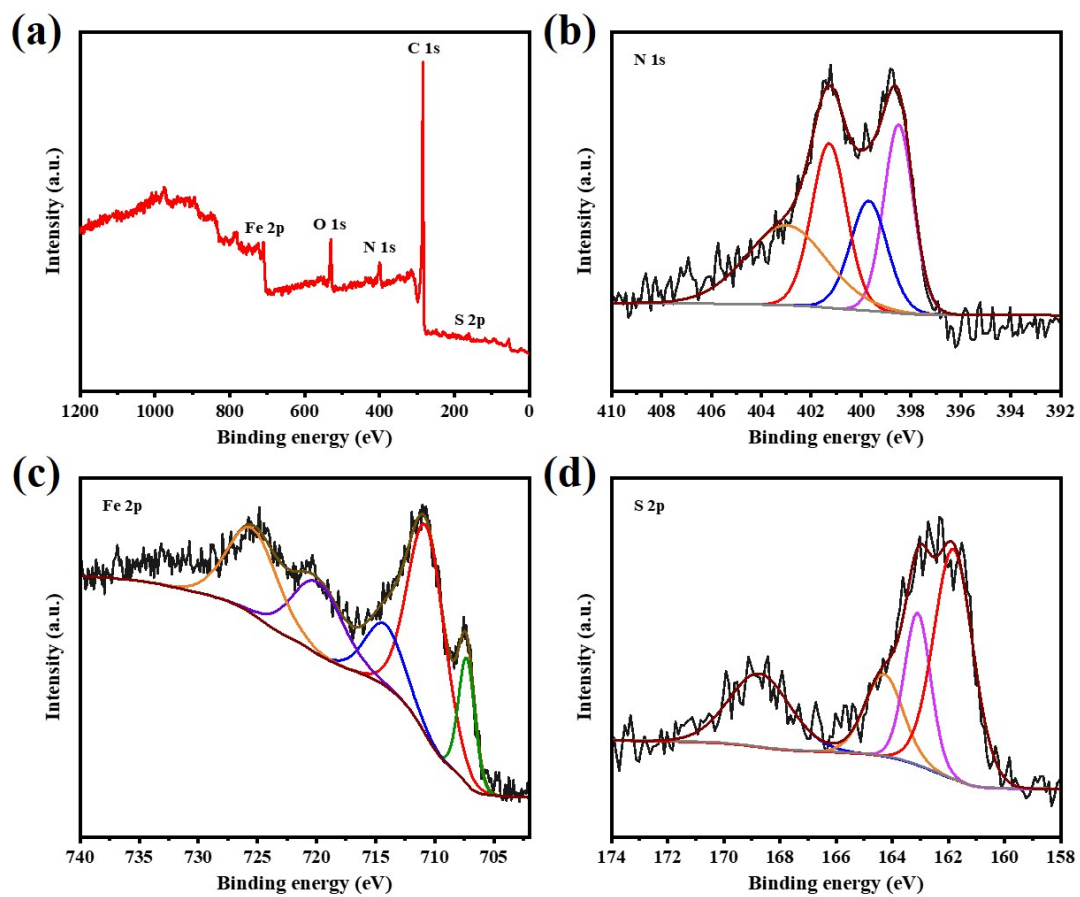

**Fig. S5** (a) XPS survey spectrum of Nano-FeS/Fe<sub>3</sub>C@NCNTs-800, and high resolution XPS spectra of (b) N 1s, (c) Fe 2p, (d) S 2p for Nano-FeS/Fe<sub>3</sub>C@NCNTs-800.

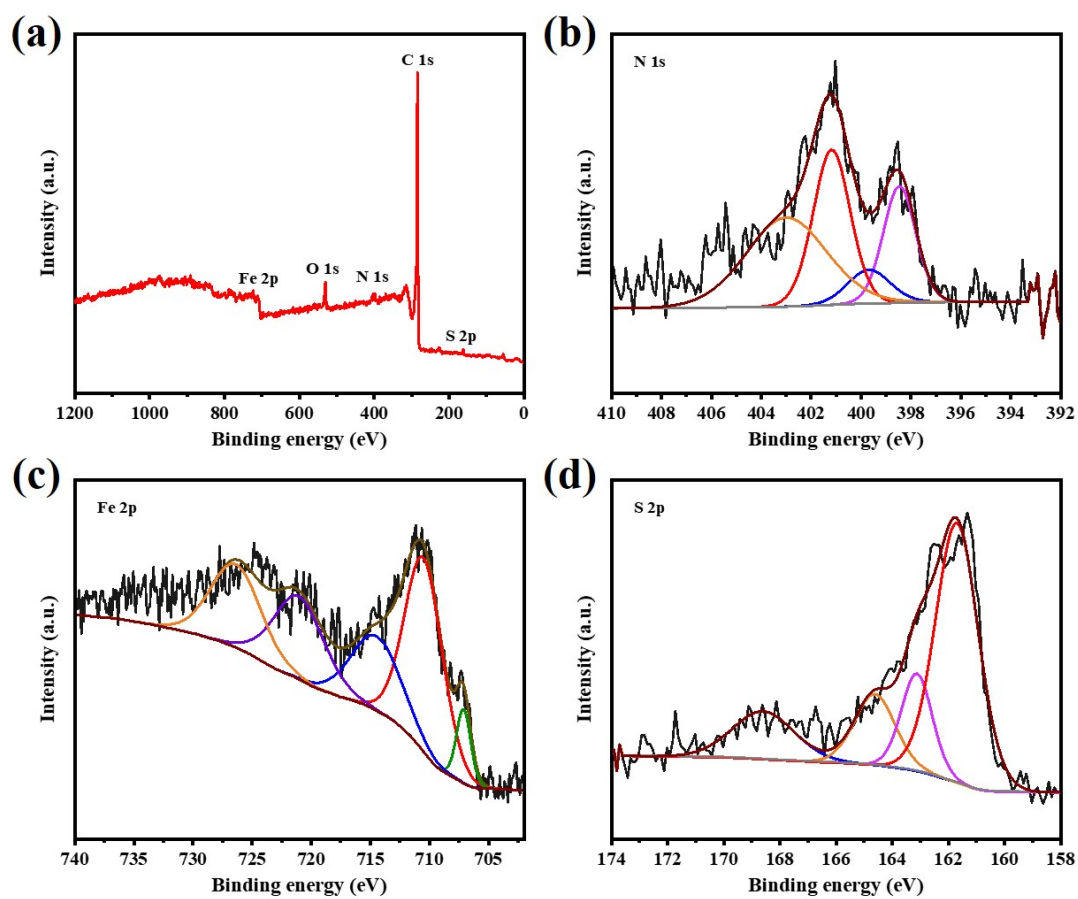

**Fig. S6** (a) XPS survey spectrum of Nano-FeS/Fe<sub>3</sub>C@NCNTs-900 and high resolution XPS spectra of (b) N 1s, (c) Fe 2p, (d) S 2p for Nano-FeS/Fe<sub>3</sub>C@NCNTs-900.

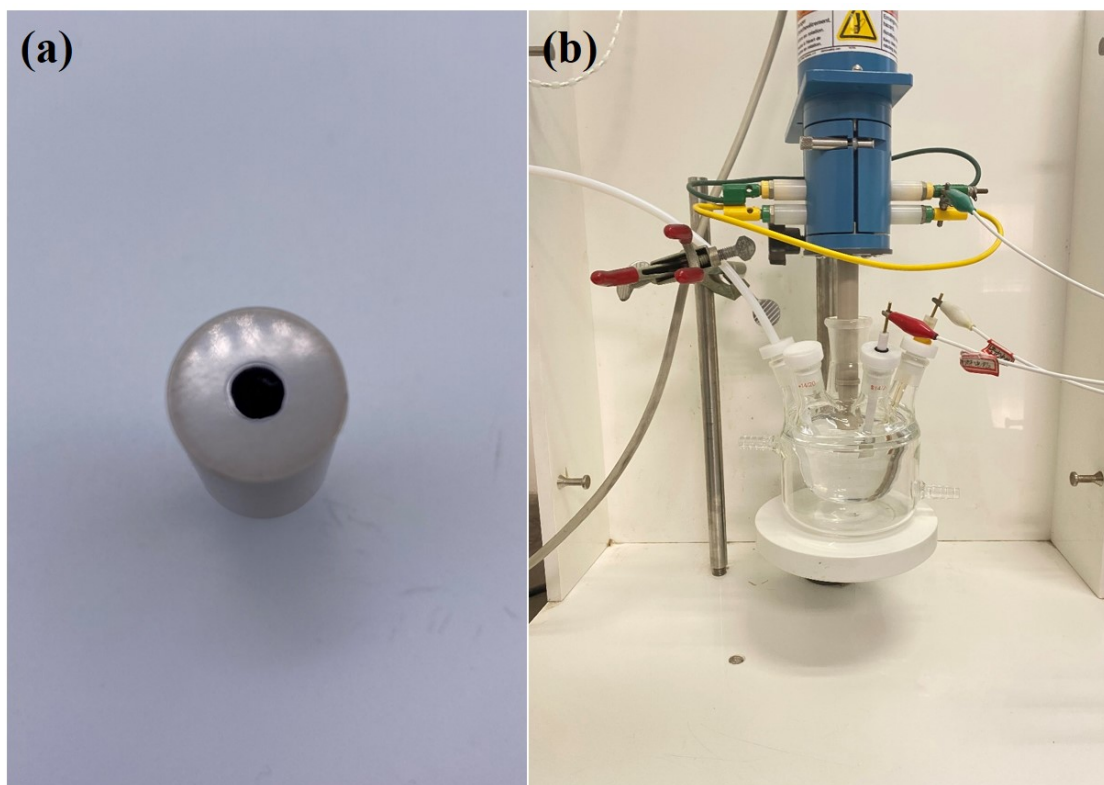

**Fig. S7** Digital images showing (a) samples directly attached to the glassy carbon electrode and (b) the test device of rotating disk electrode.

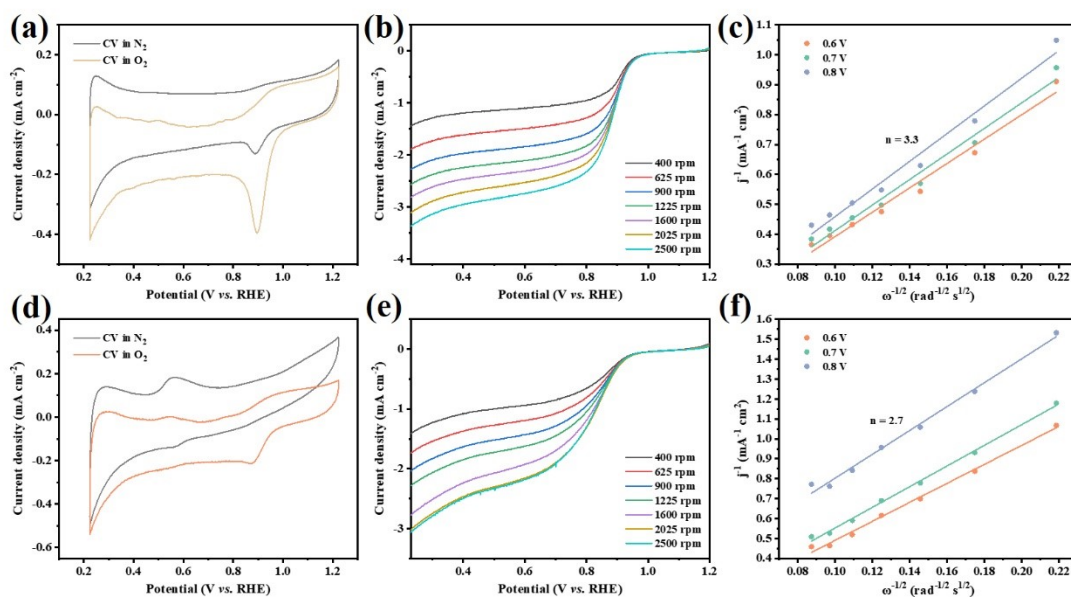

**Fig. S8** (a) Cyclic voltammograms in  $N_2$ - and  $O_2$ -saturated 1 M KOH solution with a scan rate of  $5 \text{ mV s}^{-1}$ , (b) ORR polarization curve of Nano-FeS/Fe<sub>3</sub>C@NCNTs-800 and (c) corresponding K-L curves in  $O_2$ -saturated 1 M KOH solution at various rotation speeds, (d) cyclic voltammograms in  $N_2$ - and  $O_2$ -saturated 1 M KOH solution with a scan rate of  $5 \text{ mV s}^{-1}$ , (e) ORR polarization curve of Nano-FeS/Fe<sub>3</sub>C@NCNTs-900 and (f) corresponding K-L curves in  $O_2$ -saturated 1 M KOH solution at various rotation speeds.

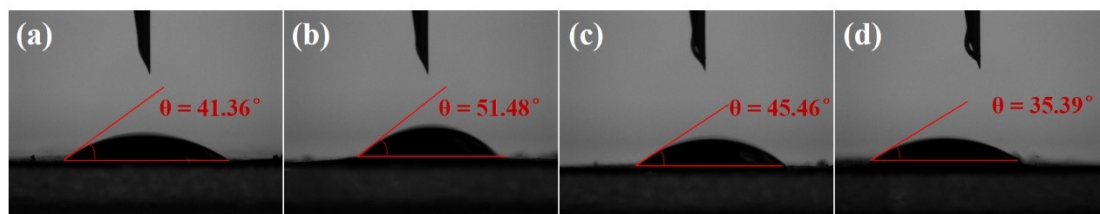

**Fig. S9** Contact angles of (a) Pt/C, (b) FeS@NCNTs, (c) Fe<sub>3</sub>C@NCNTs and Nano-FeS/Fe<sub>3</sub>C@NCNTs with 1 M KOH solution.

**Table S1.** Resistances obtained by fitting electrochemical impedance spectra at open circuit potential.

|                            | <b>Pt/C</b> | <b>Nano-FeS/Fe<sub>3</sub>C@NCNTs-700</b> | <b>FeS@NCNTs-700</b> | <b>Fe<sub>3</sub>C@NCNTs-700</b> |
|----------------------------|-------------|-------------------------------------------|----------------------|----------------------------------|
| <b>R<sub>ohm</sub> (Ω)</b> | 5.393       | 5.321                                     | 7.793                | 5.48                             |
| <b>R<sub>f</sub> (Ω)</b>   | 0.49592     | 1.915                                     | 4.022                | 0.72193                          |
| <b>R<sub>ct</sub> (Ω)</b>  | 3167        | 8507                                      | 395.1                | 26244                            |

**Table S2.** Resistances obtained by fitting electrochemical impedance spectra at 0.42 V vs. RHE.

|                            | <b>Pt/C</b> | <b>Nano-FeS/Fe<sub>3</sub>C@NCNTs-700</b> | <b>FeS@NCNTs-700</b> | <b>Fe<sub>3</sub>C@NCNTs-700</b> |
|----------------------------|-------------|-------------------------------------------|----------------------|----------------------------------|
| <b>R<sub>ohm</sub> (Ω)</b> | 5.385       | 5.483                                     | 8.095                | 5.442                            |
| <b>R<sub>f</sub> (Ω)</b>   | 0.50133     | 1.694                                     | 3.52                 | 0.82297                          |
| <b>R<sub>ct</sub> (Ω)</b>  | 8443        | 7154                                      | 2800                 | 9641                             |

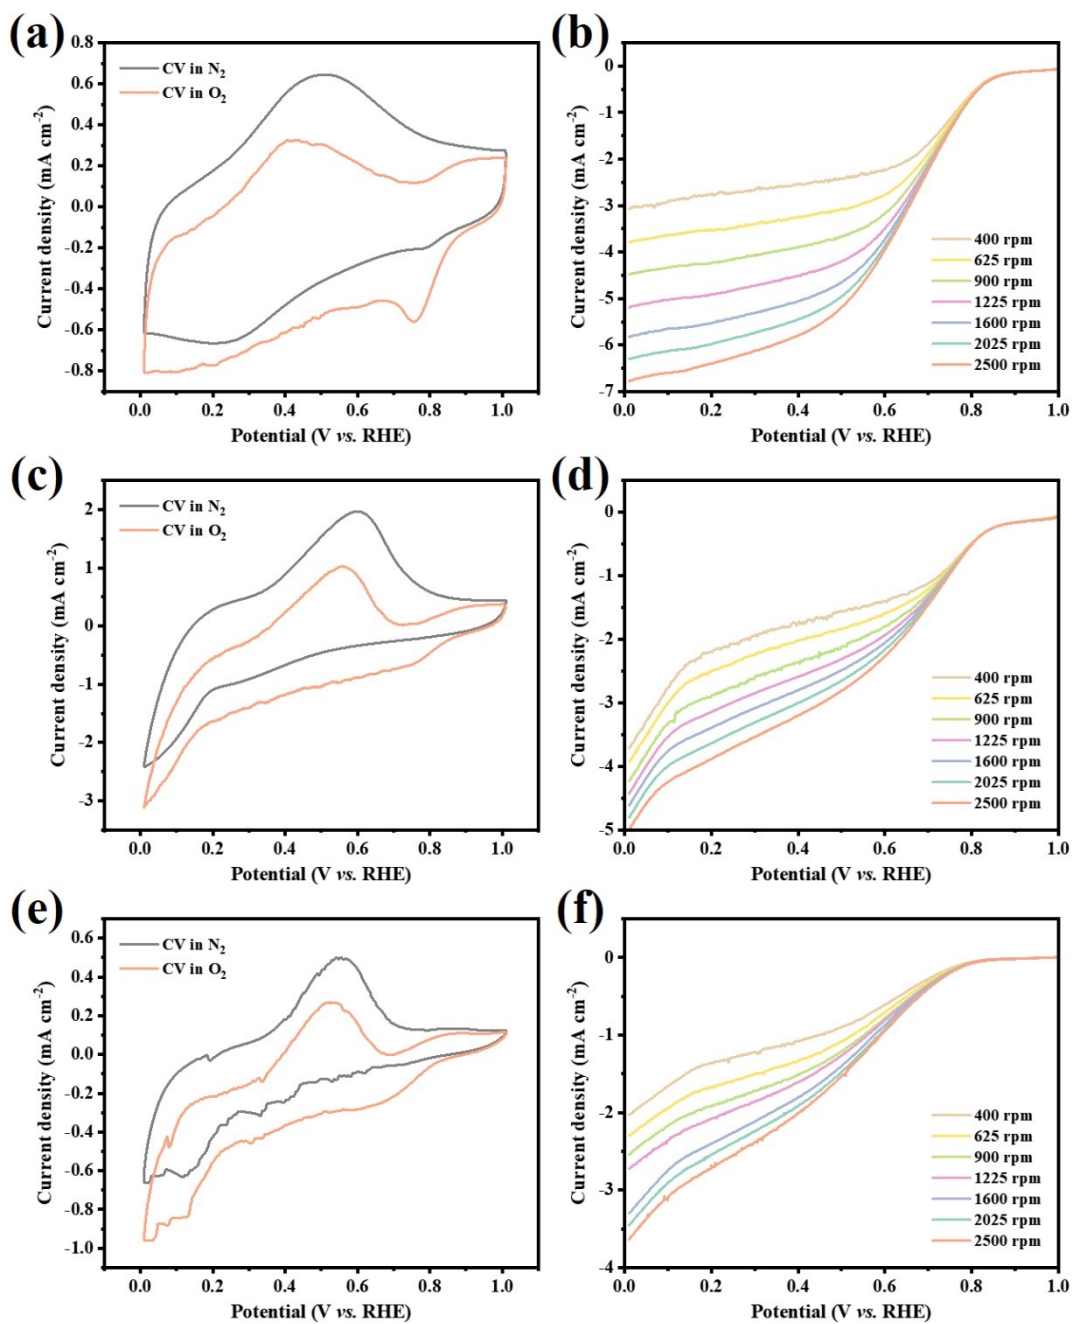

**Fig. S10** Cyclic voltammograms in N<sub>2</sub>- and O<sub>2</sub>-saturated PBS with a scan rate of 5 mV s<sup>-1</sup> and linear voltammograms in O<sub>2</sub>-saturated PBS at various rotation speeds for (a, b) Nano-FeS/Fe<sub>3</sub>C@NCNTs-700, (c,d) Nano-FeS/Fe<sub>3</sub>C@NCNTs-800 and (e,f) Nano-FeS/Fe<sub>3</sub>C@NCNTs-900.

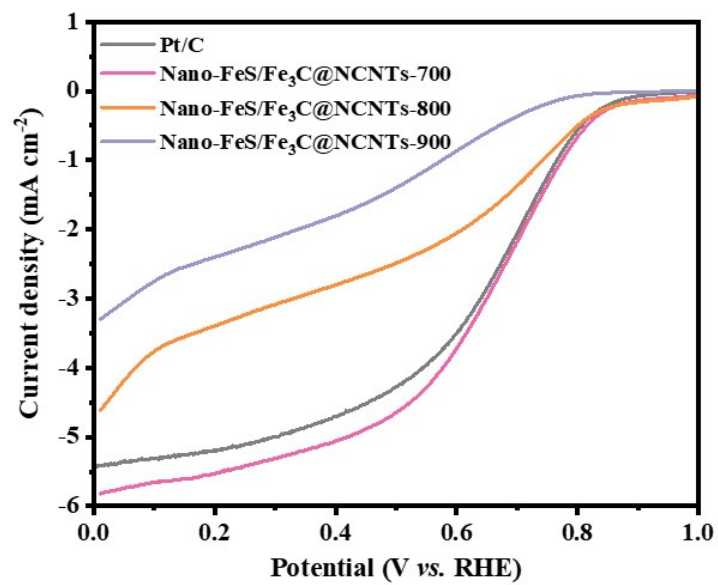

**Fig. S11** Linear voltammograms of Nano-FeS/Fe<sub>3</sub>C@NCNTs in O<sub>2</sub>-saturated PBS at 1600 rpm.



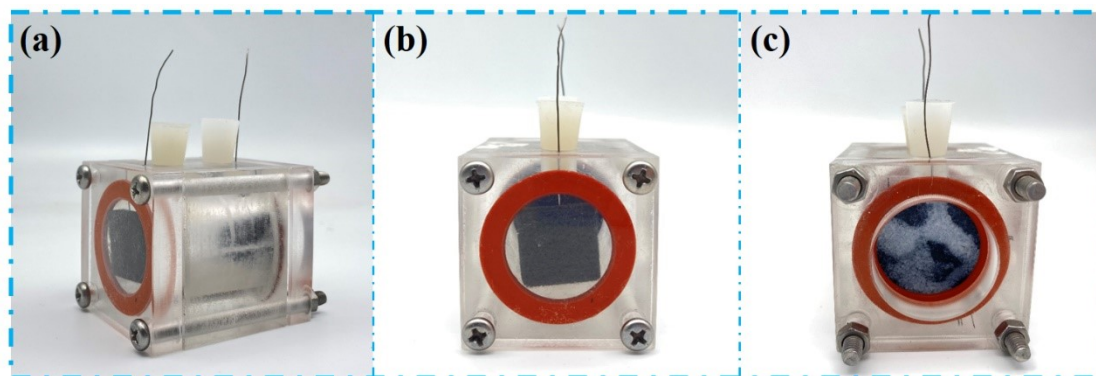

**Fig. S12** Digital images of (a) the assembled MFCs with (b) carbon felt as anode and (c) carbon cloth coated with electrocatalysts as cathode.

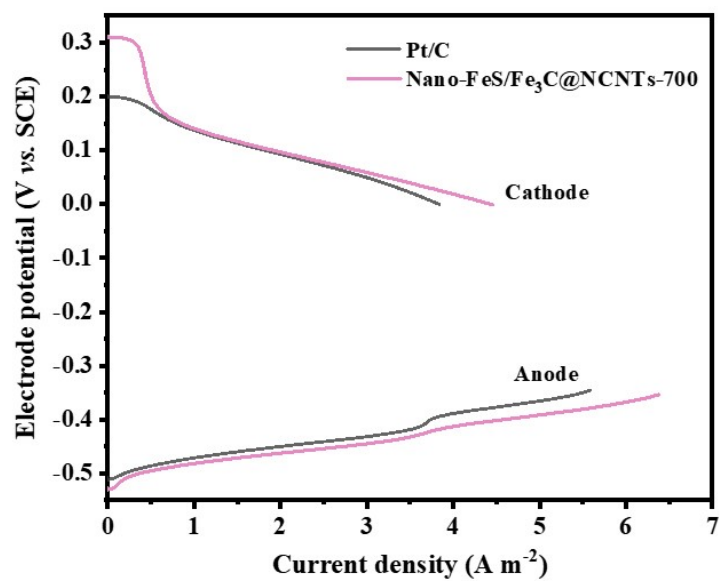

**Fig. S13** Polarization curves of cathode and anode after two weeks' operation for the MFCs with different cathodes.

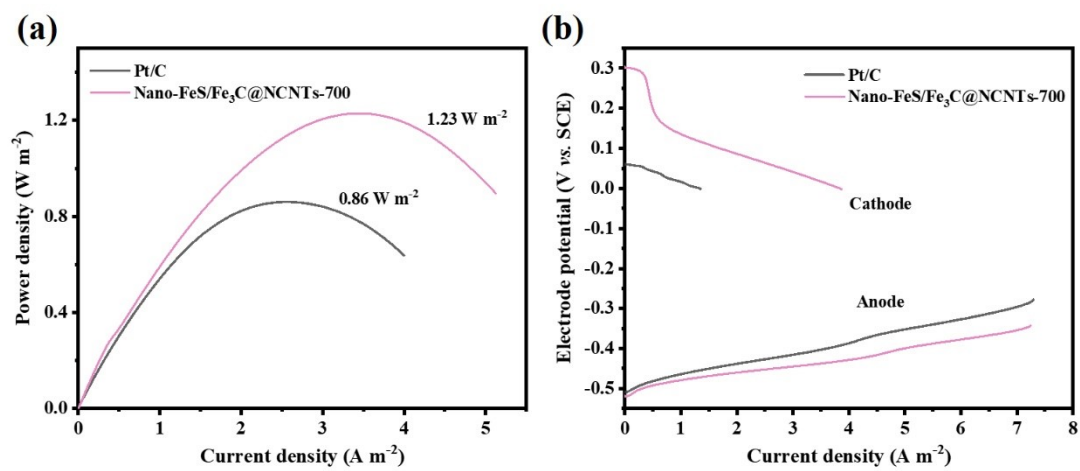

**Fig. S14** (a) Power density curves and (b) polarization curves of cathode and anode after one month's operation for the MFCs with different cathodes.

## References

- 1 G. Kresse and J. Furthmuller, *Phys. Rev. B*, 1996, **54**, 11169-11186.
- 2 G. Kresse and J. Furthmiiller, *Comp. Mater. Sci.*, 1996, **6**, 15-50.
- 3 J. P. Perdew, K. Burke and M. Ernzerhof, *Phys. Rev. Lett.*, 1996, **77**, 3865-3868.
- 4 P. E. Blochl, *Phys. Rev. B*, 1994, **50**, 17953-17979.
- 5 G. Kresse and D. Joubert, *Phys. Rev. B*, 1999, **59**, 1758-1775.
